# Supplementary material for: Ab Initio Approach to the Structure, Vibrational Properties, and Electron Binding Energies of H2S∙∙∙SO2
Source: MDPI journal article supplement (doi:10.3390/molecules28186656), 2023-09-16
Supplement: s1 [file s1]

Article

# Ab initio approach to the structure, vibrational properties, and electron binding energies of $\text{H}_2\text{S}\cdots\text{SO}_2$ .

Isaac O. M. Magalhães<sup>1</sup>, B. J. C. Cabral<sup>2</sup> and João B. L. Martins<sup>3,\*</sup>

<sup>1</sup> Computational Chemistry Laboratory, Institute of Chemistry, University of Brasília, Brasília, DF, 70910900, Brazil  
isaac.magalhaes@aluno.unb.br

<sup>2</sup> Biosystems and Integrative Sciences Institute, BioISI, Faculdade de Ciências de Lisboa, 1749-016  
Lisboa, Portugal and Institute of Chemistry, University of Brasília, Brasília, DF, Brazil; [bjcabral@fc.ul.pt](mailto:bjcabral@fc.ul.pt)

<sup>3</sup> Computational Chemistry Laboratory, Institute of Chemistry, University of Brasília, Brasília, DF, 70910900, Brazil, e-mail: [lopes@unb.br](mailto:lopes@unb.br)

\*Correspondence: [e-mail@e-mail.com](mailto:e-mail@e-mail.com); Tel.: (optional; include country code; if there are multiple corresponding authors, add author initials)

**Citation:** To be added by editorial staff during production.

Academic Editor: Firstname Lastname

Received: date

Revised: date

Accepted: date

Published: date

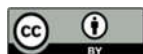

**Copyright:** © 2023 by the authors.  
Submitted for possible open access publication under the terms and conditions of the Creative Commons Attribution (CC BY) license (<https://creativecommons.org/licenses/by/4.0/>).

## Supplementary Materials:

**Table S1** – Interatomic distances (Å) and bond angles (degrees) the H<sub>2</sub>S⋯SO<sub>2</sub> complex.

|                       | r(SO)         | r(SH)         | H⋯O    | r(S⋯S) | r(A⋯B) |
|-----------------------|---------------|---------------|--------|--------|--------|
| MP2/AVTZ              | 1.4643        | 1.3377        | 3.8076 | 3.4143 | 3.4006 |
| MP2/AVQZ              | 1.4522        | 1.3357        | 3.1373 | 3.3866 | 3.3850 |
| MP2/AV5Z              | 1.4447        | 1.3343        | 3.1563 | 3.3822 | 3.3838 |
| CCSD/AVTZ             | 1.4425        | 1.3404        | 3.3147 | 3.4993 | 3.5037 |
| CCSD/AVQZ             | 1.4306        | 1.3382        | 3.3350 | 3.4805 | 3.4905 |
| CCSDT/AVTZ            | 1.4562        | 1.343         | 3.1813 | 3.4543 | 3.4420 |
| CCSDT/AVQZ            | 1.4437        | 1.3409        | 3.2210 | 3.4274 | 3.4283 |
| Exp.[11]              |               |               |        | 3.45   |        |
| MP2/6-311++G(d,p) [8] |               |               |        | 3.802  |        |
| MP2/6-31G*[12]        | 1.4767/1.4769 | 1.3389/1.3393 | 3.07   | 3.5768 |        |
| Exp[16]               |               |               | 3.145  | 3.520  | 3.534  |

(A⋯B) stands for the distance regarding the center of mass

**Table S2.** Angles (degrees) in SO<sub>2</sub>, H<sub>2</sub>S and in the SO<sub>2</sub>⋯H<sub>2</sub>S complex, where  $\theta$  and  $\phi$  are defined as in Ref. [10].

|              | OSO    | HSH   | OS⋯S  | S⋯SH  | $\theta$           | $\phi$            |
|--------------|--------|-------|-------|-------|--------------------|-------------------|
| MP2/AVTZ     | 118.19 | 92.23 | 89.27 | 76.77 | 88.623             | 70.768            |
| MP2/AVQZ     | 118.60 | 92.30 | 90.11 | 78.40 | 90.215             | 73.140            |
| MP2/AV5Z     | 119.00 | 92.31 | 90.33 | 79.24 | 90.615             | 74.288            |
| CCSD/AVTZ    | 117.89 | 92.61 | 90.48 | 81.83 | 90.619             | 77.391            |
| CCSD/AVQZ    | 118.32 | 92.72 | 90.70 | 82.37 | 91.324             | 78.983            |
| CCSDT/AVTZ   | 117.84 | 92.33 | 89.25 | 78.43 | 88.558             | 73.168            |
| CCSDT/AVQZ   | 118.27 | 92.45 | 90.12 | 80.33 | 90.248             | 75.960            |
| Other values |        |       |       |       |                    |                   |
| Expt.        |        |       |       |       | 103(a);<br>99.0(b) | 71(a);<br>56.8(b) |

|                      |       |      |      |      |
|----------------------|-------|------|------|------|
| MP2/6311++G(d,p) (c) | 118.6 | 92.0 | 72.9 | 67.3 |
| MP2/6-31G (d)        | 119.3 | 94.0 |      |      |

(a) [11]; (b) [16]; (c) [8] (d) [12]

**Table S3** Difference of bond distances and angles of H<sub>2</sub>S and SO<sub>2</sub> in relation to the monomer.

| Delta      | DSO    | DSH    | DOSO   | DHSH   |
|------------|--------|--------|--------|--------|
| MP2/AVTZ   | 0.0007 | 0.0019 | 0.004  | 0.152  |
| MP2/AVQZ   | 0.0009 | 0.0021 | -0.227 | -0.676 |
| MP2/AV5Z   | 0.0010 | 0.0015 | 0.062  | -0.631 |
| CCSD/AVTZ  | 0.0009 | 0.0006 | 0.018  | -0.500 |
| CCSD/AVQZ  | 0.0008 | 0.0010 | 0.119  | -0.499 |
| CCSDT/AVTZ | 0.0009 | 0.0011 | 0.037  | -0.537 |
| CCSDT/AVQZ | 0.0010 | 0.0012 | 0.079  | -0.549 |

DSO=r(SO)dimer-r(SO)monomer; DSH= r(SH)dimer-r(SH)monomer; DOSO= r(SO)dimer-r(SO)monomer; DHSH= r(SH)dimer-r(SH) monomer;

**Table S4.** Vibrational frequencies (in cm<sup>-1</sup>) for the antisymmetric  $\nu_{1a}$  and symmetric  $\nu_{1s}$  stretching modes in H<sub>2</sub>S...SO<sub>2</sub>.

|            | H <sub>2</sub> S |            | SO <sub>2</sub> |            |
|------------|------------------|------------|-----------------|------------|
|            | $\nu_{1a}$       | $\nu_{1s}$ | $\nu_{1a}$      | $\nu_{1s}$ |
| MP2/AVTZ   | 2781.4           | 2762.2     | 1303.9          | 1104.9     |
| MP2/AVQZ   | 2783.0           | 2764.0     | 1327.9          | 1122.7     |
| MP2/AV5Z   | 2787.0           | 2768.3     | 1346.9          | 1136.0     |
| CCSD/AVTZ  | 2742.8           | 2728.1     | 1392.6          | 1207.0     |
| CCSD/AVQZ  | 2748.1           | 2733.5     | 1419.0          | 1226.5     |
| CCSDT/AVTZ | 2720.3           | 2704.2     | 1326.6          | 1138.6     |
| CCSDT/AVQZ | 2725.5           | 2709.5     | 1355.5          | 1160.1     |

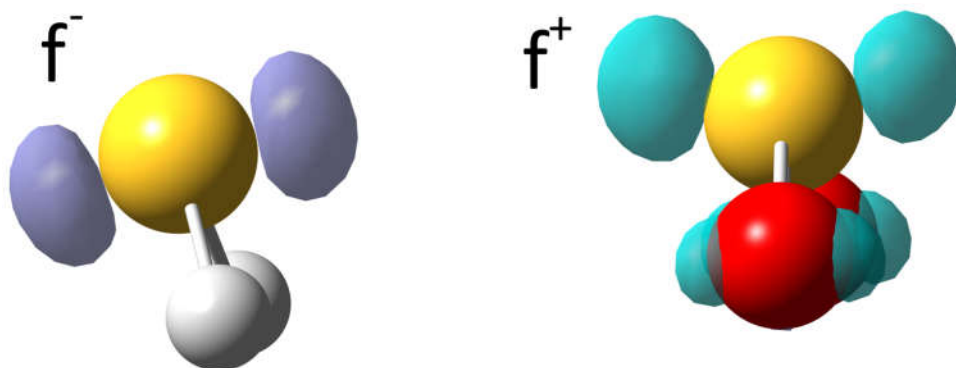

Figure S1 – Fukui functions plotted for the complex using CCSD(T)/aug-cc-pVQZ.
